# Supplementary material for: Enhancement of superconducting critical current density by Fe impurity substitution in NbSe2 single crystals and the vortex pinning mechanism
Source: Royal Society of Chemistry journal article supplement (doi:10.1039/c7cp00784a), 2017-01-01
Supplement: c7cp00784a1.pdf [file c7cp00784a1.pdf]

# Enhancement of superconducting critical current density by Fe impurities substitution in NbSe<sub>2</sub> single crystal and vortex pinning mechanism

RukshanaPervin<sup>1</sup>, ManikanadanKrishnan<sup>2</sup>, Amit Kumar Rana<sup>1</sup>, M. Kannan<sup>2</sup>, S. Arumugam<sup>2</sup>, Parasharam M.Shirage<sup>1,\*</sup>

<sup>1</sup>Discipline of Metallurgy Engineering and Materials Science & Physics, Indian Institute of Technology Indore, Simrol Campus, Khandwa road, Indore 453552, India

<sup>2</sup>Centre of High Pressure Research, School of Physics, Bharathidasan University, Tiruchirappalli 620024, India

\*Corresponding author Email: [pms Shirage@iti.ac.in](mailto:pms Shirage@iti.ac.in), [paras.shirage@gmail.com](mailto:paras.shirage@gmail.com)

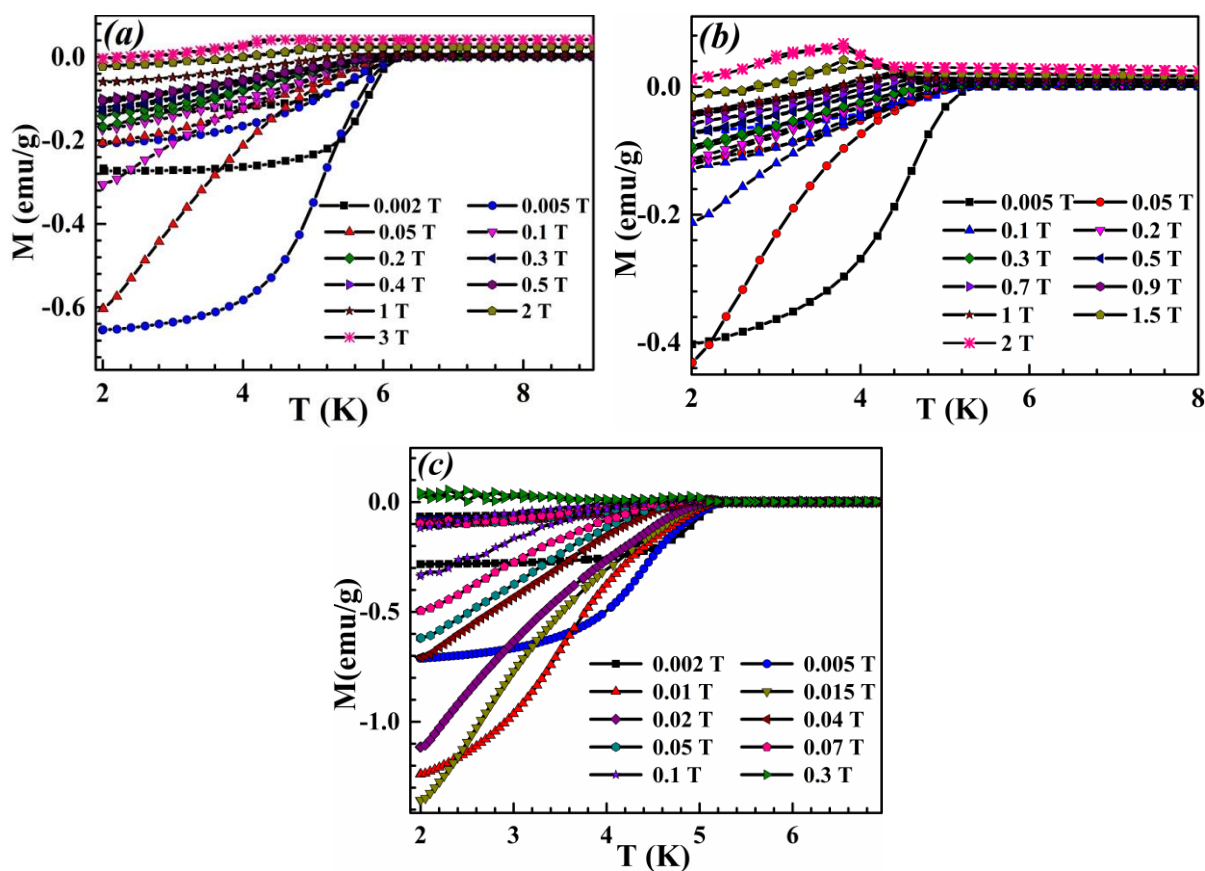

Figure S1. (Color online) Shows the temperature dependence of magnetization curve of (a) pure NbSe<sub>2</sub>, (b) Fe<sub>0.0008</sub>NbSe<sub>2</sub> and (c) Fe<sub>0.0011</sub>NbSe<sub>2</sub> single crystal at different magnetic fields.
